# Supplementary material
Source: publisher figshare collection journal article supplement (https://karger.figshare.com/ndownloader/files/20135753)
Supplement: Supplementary file 1 [file 20135753]

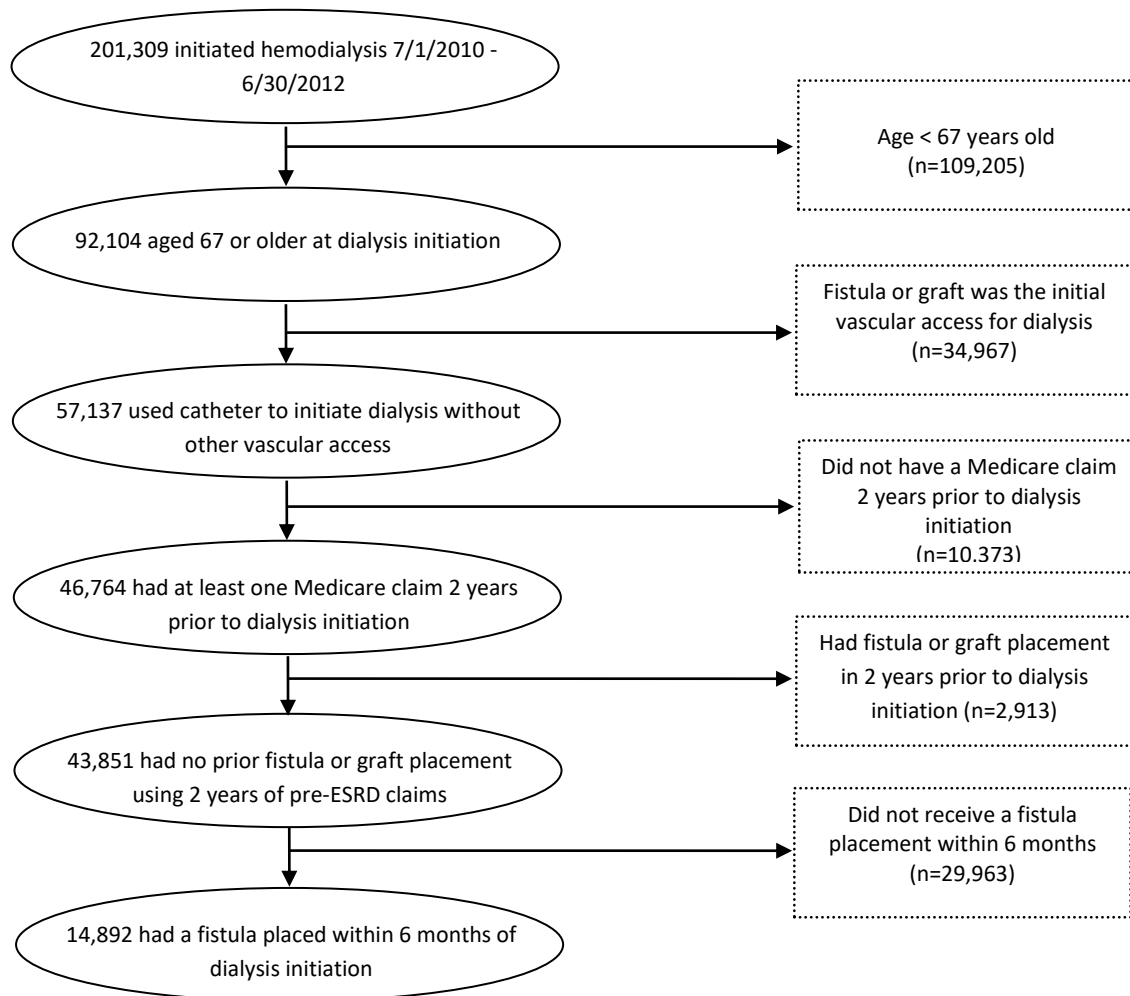

**Figure S1. Development of the study validation data set.**

**Table S1. International Classification of Diseases (ICD-9) and Healthcare Common Procedure Coding System (HCPCS) codes used to identify co-morbid in the U.S. older hemodialysis patients.**

| Co-Morbid Events Prior to ESRD               | ICD-9 Codes                                                                           | HCPCS Codes                               |
|----------------------------------------------|---------------------------------------------------------------------------------------|-------------------------------------------|
| <b>Diabetes</b>                              | 250,357.2,362.0,366.41                                                                |                                           |
| <b>Hypertension</b>                          | 401                                                                                   |                                           |
| <b>Coronary Artery Disease</b>               |                                                                                       |                                           |
| Myocardial Infarction                        | 410,412                                                                               |                                           |
| Atherosclerosis/stenosis                     | 413,414                                                                               |                                           |
| Coronary Revascularization                   | 360,361, 00.66,v4581,v4582                                                            | 9298x,3351x,3352x,92990-92996,33531-33536 |
| <b>Congestive Heart Failure</b>              | 398.91,402.01,402.11,402.91,404.01,404.03,404.11,404.13,404.91,404.93,425.4-425.9,428 |                                           |
| <b>Peripheral Vascular Disease</b>           | 440-444,447,451-453,557                                                               |                                           |
| <b>Cerebrovascular Disease</b>               | 362.34, 430-438                                                                       |                                           |
| <b>Stroke</b>                                | 430,431,436,433x1,434x1                                                               |                                           |
| <b>Chronic Obstructive Pulmonary Disease</b> | 491.0,491.1,491.8,491.9,491.20,491.21,491.22,492.0,492.8,494.0,494.1,496              |                                           |
| <b>Cancer</b>                                | 140-200                                                                               |                                           |

**Table S2. Unadjusted and adjusted odds ratios and associated 95% confidence intervals for arteriovenous fistula (AVF) primary failure in the U.S. older hemodialysis patients.**

|            | <b>Unadjusted odds Ratio (95% CI)</b> | <b>Adjusted odds Ratio (95% CI)</b> |
|------------|---------------------------------------|-------------------------------------|
| PVD        | 1.15(1.08,1.23)                       | 1.13(1.06,1.21)*                    |
| CAD        | 1.15(1.07,1.23)                       | 1.13(1.06,1.22)**                   |
| White Race | 0.90(0.83,0.97)                       | 0.92(0.85,0.99)***                  |

\*Adjusted by age, sex, race, BMI, CVC dependency, CAD, and diabetes.

\*\* Adjusted by age, sex, race, BMI, CVC dependency, PVD, and diabetes.

\*\*\* Adjusted by age, sex, BMI, CVC dependency, CAD, PVD, and diabetes.
